# Supplementary material
Source: Royal Society of Chemistry journal article supplement (doi:10.1039/d6fd00078a)
Supplement: d6fd00078a1.pdf [file d6fd00078a1.pdf]

## Glucose electrooxidation reaction on Ni-based nanocatalysts for replacing OER in alkaline electrolyser

Axel Rigoulet<sup>1</sup>, Têko Napporn<sup>1,2,1</sup>, Christophe Coutanceau<sup>1,2</sup>

<sup>1</sup>IC2MP CNRS, Université de Poitiers, 4 rue Michel Brunet, 86073 Poitiers cedex 9, France.

<sup>2</sup>French Research Network on Hydrogen, FR H2, France

| SI figures captions.                                                                                                                                                                                                | Page |
|---------------------------------------------------------------------------------------------------------------------------------------------------------------------------------------------------------------------|------|
| <b>Figure SI 1.</b> HPLC chromatograms of standard solutions of sodium formate at concentrations between 0.01 and 0.1 M (left). Corresponding calibration curve (right).                                            | 2    |
| <b>Table SI 2.</b> Name of all the compounds that were potentially expected to be produced during electrolysis with their structure and experimentally determined retention times.                                  | 3    |
| <b>Figure SI 3.</b> Plots of the charge transferred during electrolysis against electrolysis time (red dashed traces correspond to the ideal case, calculated by linear regression of the beginning of each curve). | 4    |
| <b>Figure SI 4.</b> Nyquist (left) and Bode (right) plots for each {material, aldose} set. Legend: s.e. = supporting electrolyte; ald = aldose; b.e. = before electrolysis; a.e. = after electrolysis.              | 5    |

---

<sup>1</sup> Corresponding author, [teko.napporn@univ-poitiers.fr](mailto:teko.napporn@univ-poitiers.fr)

### SI 1. Chromatograms of formic acid standards and calibration curve

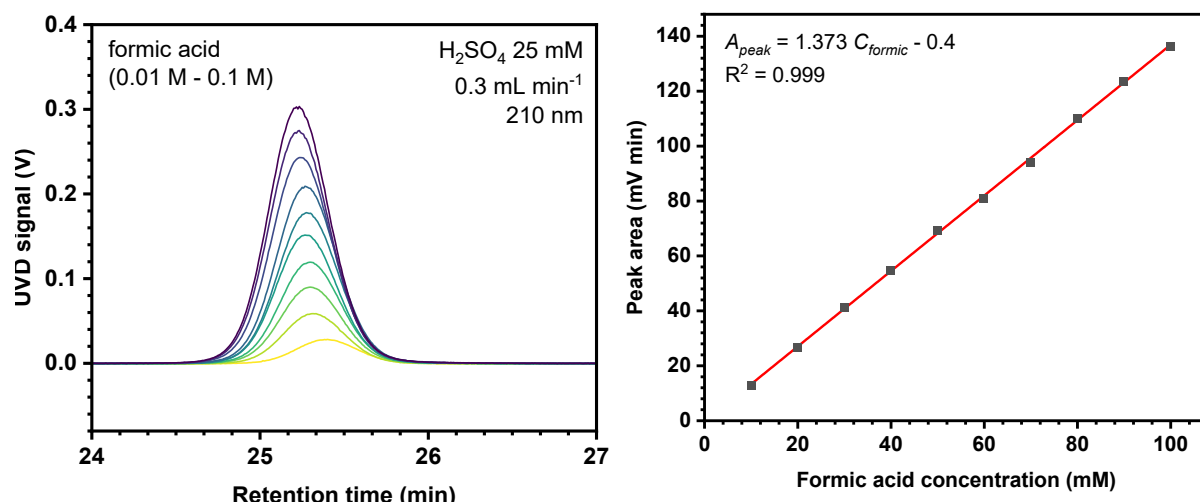

**Figure SI 1.** HPLC chromatograms of standard solutions of sodium formate at concentrations between 0.01 and 0.1 M (left). Corresponding calibration curve (right).

## SI 2. Retention times of all the envisaged reaction products.

| Compound            | Structure                                                                           | $t_R$ (min) |
|---------------------|-------------------------------------------------------------------------------------|-------------|
| Glucaric acid       | 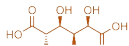   | 14.7        |
| Oxalic acid         |    | 14.7        |
| Glucuronic acid     |    | 14.8        |
| 5-ketogluconic acid |    | 15.5        |
| Gluconic acid       |    | 16.0        |
| Tartronic acid      |    | 16.1        |
| Tartaric acid       |    | 16.5        |
| Xylonic acid        |    | 16.9        |
| Fructose            |    | 17.2        |
| Glyoxylic acid      |    | 17.4        |
| Threonic acid       |    | 17.7        |
| Glyceric acid       |    | 19.5        |
| Lactic acid         |    | 20.7        |
| Glycolic acid       |   | 22.2        |
| Formic acid         |  | 25.3        |
| Acetic acid         |  | 27.2        |

**Table SI 2.** Name of all the compounds that were potentially expected to be produced during electrolysis with their structure and experimentally determined retention times.

### SI 3. Deviation from linearity in Q-t plots for all tested conditions.

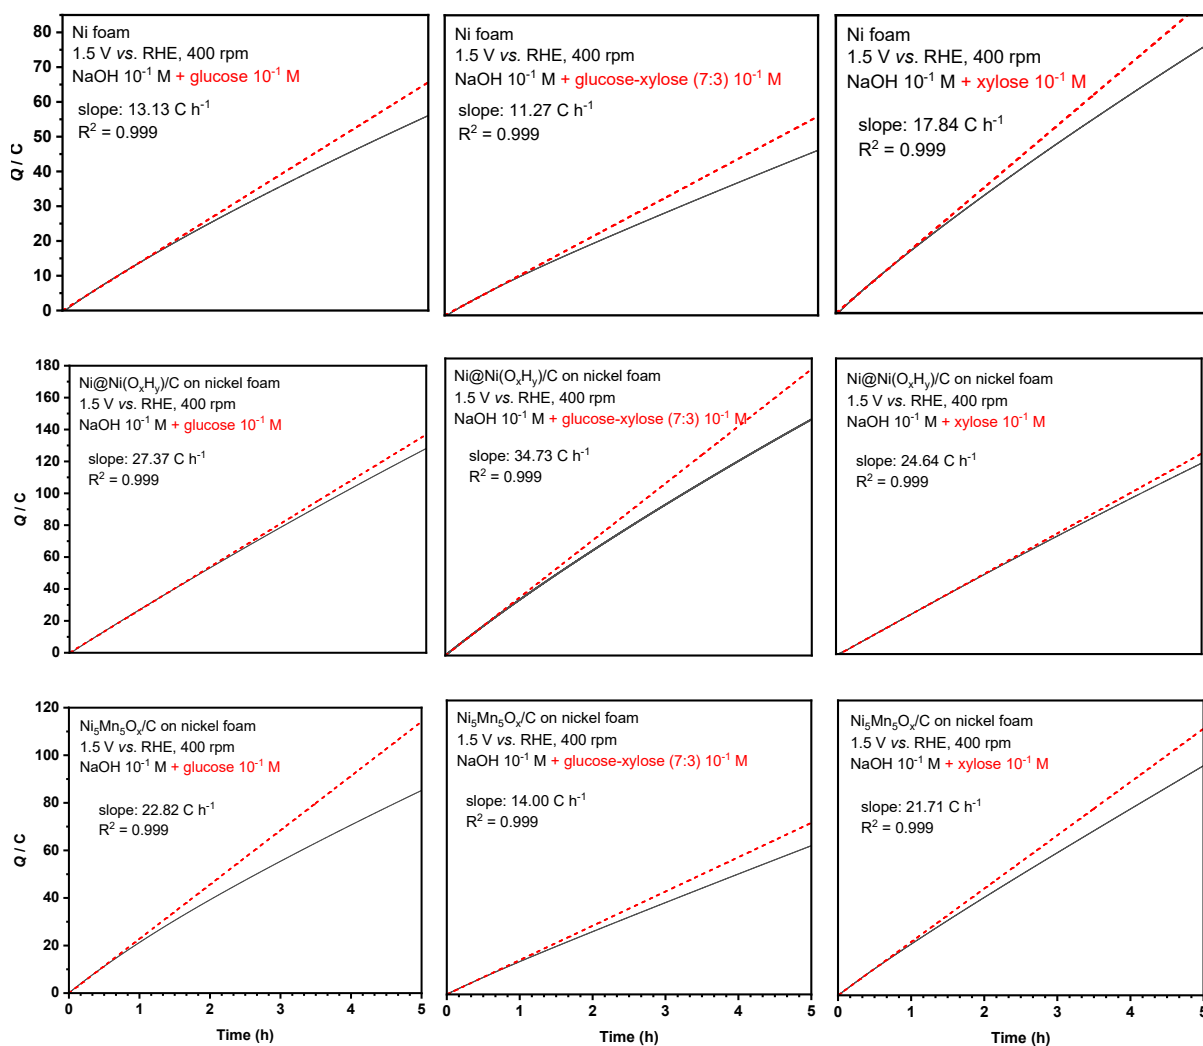

**Figure SI 3.** Plots of the charge transferred during electrolysis against electrolysis time (red dashed traces correspond to the ideal case, calculated by linear regression of the beginning of each curve).

## SI 4. Nyquist and Bode diagrams for the different electrolysis conditions.

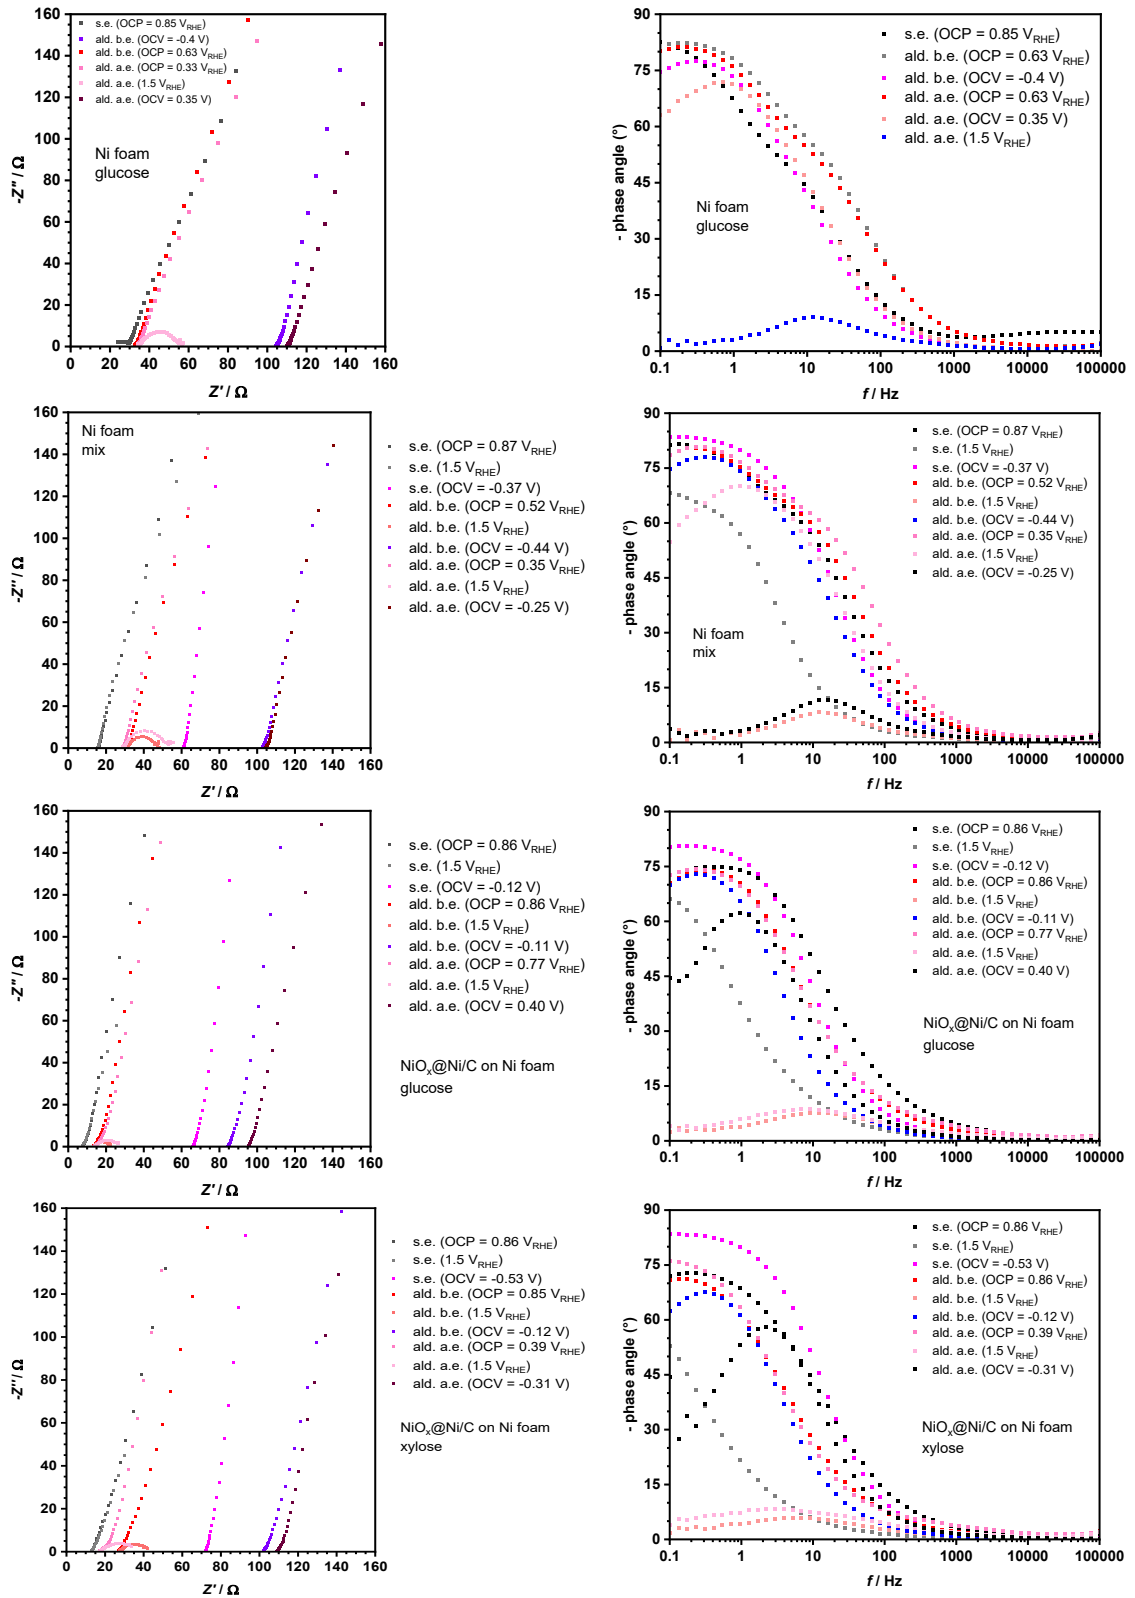

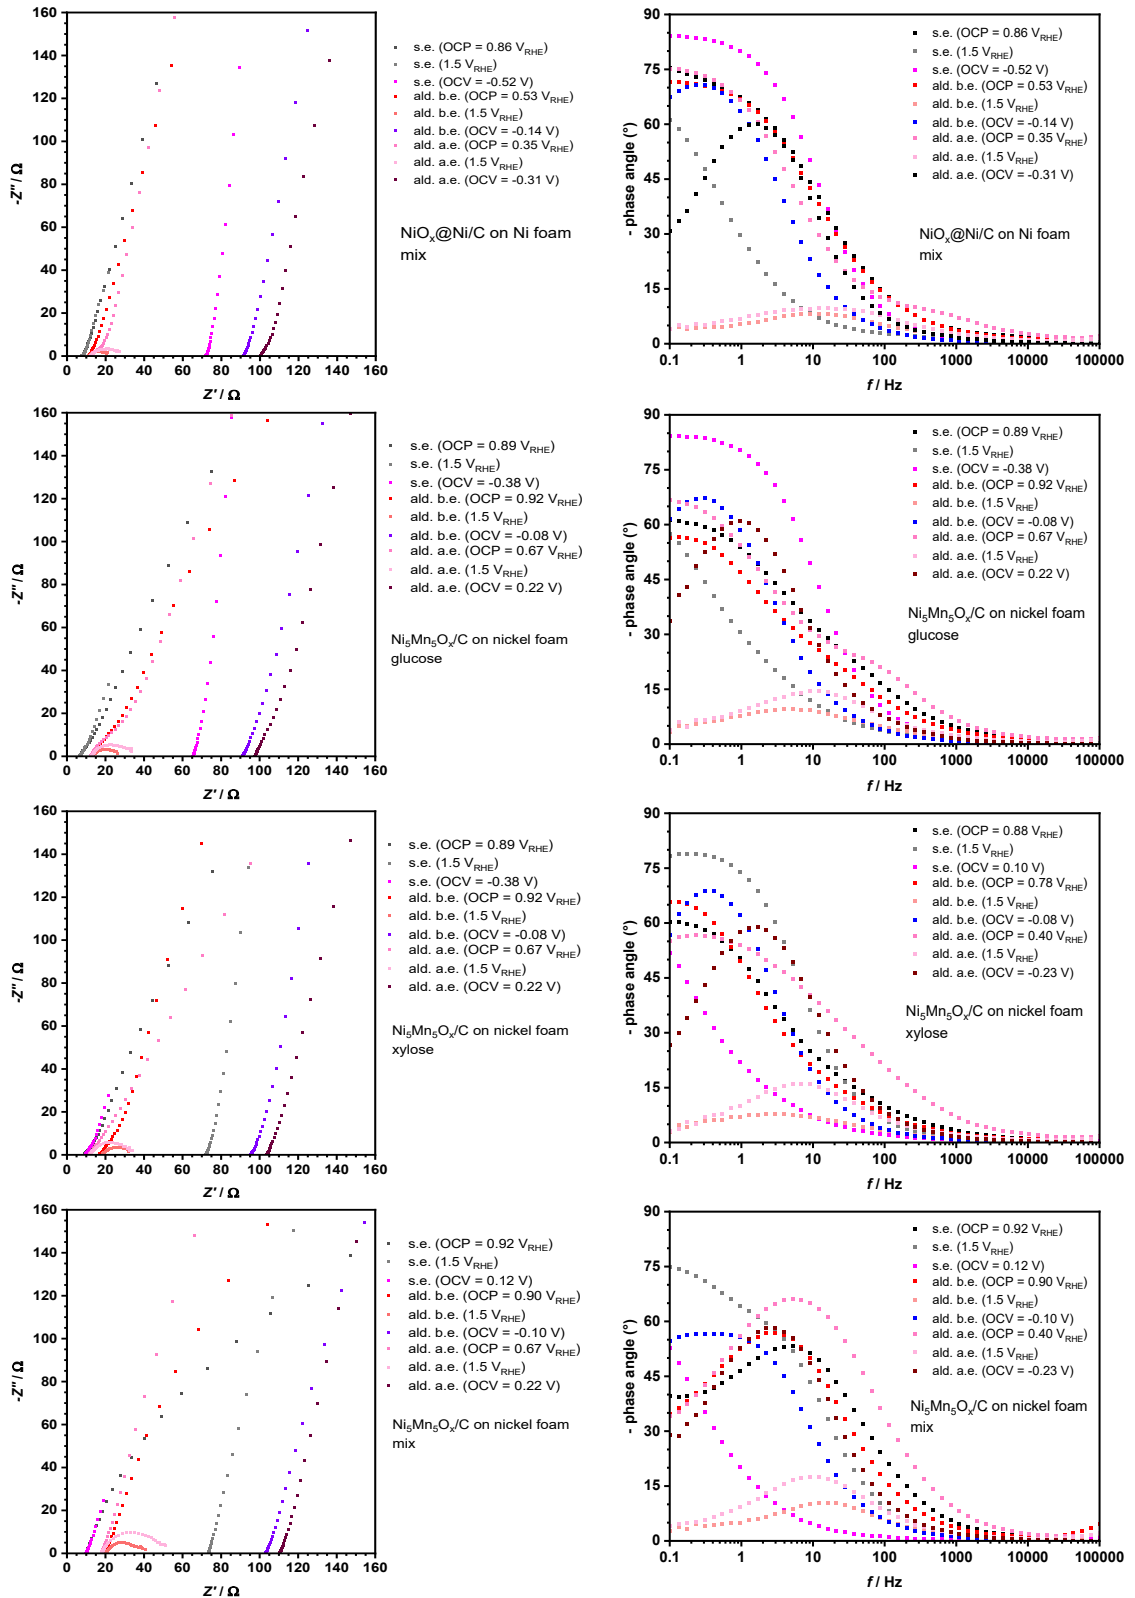

**Figure SI 4.** Nyquist (left) and Bode (right) plots for each {material, aldo} set. Legend: s.e. = supporting electrolyte; ald = aldo; b.e. = before electrolysis; a.e. = after electrolysis.

## SI 5. Methodology of uncertainty calculation for the faradaic efficiency toward formate

The following relationship between parameters was used:

$$\text{from } FE_{f,app.} = 100 \frac{2FC_{f.a.}V_{cell}}{Q_{exp}}$$

The following error sources were considered:

- Volume of solution in the cell:  $\delta V_{cell} = 6 \cdot 10^{-5} \text{ L}$
- Time increments in chromatography:  $\delta t_{chromato} = 0.5 \text{ s}$  (converted to minutes)
- UV detector signal:  $\delta U_{chromato} = 10^{-6} \text{ mV}$
- Time increments in chronoamperometry:  $\delta t_{CA} = 1 \text{ s}$
- Current intensity in chronoamperometry:  $\delta i_{CA} = 10^{-5} \text{ A}$
- Slope of the formate calibration curve by linear regression:  $\delta k_{CC} = 9.73 \text{ mV min L mol}^{-1}$
- Intercept of the formate calibration curve by linear regression:  $\delta C_{0,CC} = 6 \cdot 10^{-1} \text{ mV min}$

From which the resulting uncertainties were calculated using the GUM formula<sup>2</sup>:

$$\delta X = \sqrt{\sum_i \left(\frac{\partial X}{\partial i} \delta i\right)^2}$$

Where  $\delta X$  is the error on quantity  $X$  which depends on quantities  $i$  with respective errors  $\delta i$ .

### Error on the formic acid chromatography peak areas $\delta A_{peak}$

$$\delta A_{peak} = \sqrt{(t_{chromato} \delta U_{chromato})^2 + (U_{chromato} \delta t_{chromato})^2}$$

$$\text{from } A_{peak} = U_{chromato} t_{chromato}$$

### Error on the formic acid concentration $\delta C_{f.a.}$

$$\delta C_{f.a.} = \sqrt{\left(\frac{\delta A_{peak}}{k_{CC}}\right)^2 + \left(\frac{C_{0,CC} - A_{peak}}{k_{CC}^2} \delta k_{CC}\right)^2 + \left(-\frac{\delta C_{0,CC}}{k_{CC}}\right)^2}$$

$$\text{from } C_{f.a.} = \frac{A_{peak} - C_{0,CC}}{k_{CC}}$$

### Error on the experimental electrolysis charge $\delta Q_{exp}$

$$\delta Q_{exp} = \sqrt{(i_{CA} \delta t_{CA})^2 + (t_{CA} \delta i_{CA})^2}$$

<sup>2</sup> General uncertainty method – Guide to the expression of uncertainty in measurement, ISO/CEI Guide 98-3:2008.

from  $Q_{exp} = i_{CA} t_{CA}$

**Error on the faradaic efficiency toward formic acid  $\delta FE_{f.a.}$**

$$\delta FE_{f.a.} = 100 \sqrt{\left(\frac{2FV_{cell}}{Q_{exp}} \delta C_{f.a.}\right)^2 + \left(\frac{2FC_{f.a.}}{Q_{exp}} \delta V_{cell}\right)^2 + \left(-\frac{2FC_{f.a.}V_{cell}}{Q_{exp}^2} \delta Q_{exp}\right)^2}$$
